# Supplementary material for: Plastic Pollution Research in Indonesia: State of Science and Future Research Directions to Reduce Impacts
Source: Frontiers journal article supplement (doi:10.3389/fenvs.2021.692907), 2021-06-08
Supplement: Table_1.XLSX [file Table_1.XLSX]

## Sheet: Literature search
No.	Location	Compartment	Subcompartment	Macro/Micro	Polymer top 3	Particle shape	Unit 1	Unit 2	Year	Citation	Affiliation 1	Affiliation 2	Affiliation 3	Affiliation 4	Affiliation 5	Affiliation 6	Affiliation 7	Affiliation 8	Title	Location	Y-coordinate	X-Coordinate
1	Tukad Badung River	Riverine	Riverbank	Macro			kg/m^2		2020	Owens, K. A., & Kamil, P. I. (2020). Adapting coastal collection methods for river assessment to increase data on global plastic pollution: Examples from India and Indonesia. Frontiers in Environmental Science, 7, 208.	University of Hartford, West Hartford, CT, United States	Catalyze Communications, Denpasar, Indonesia							Adapting Coastal Collection Methods for River Assessment to Increase Data on Global Plastic Pollution: Examples From India and Indonesia	Tukad Badung river Bali	-8.675.687	115.201.916
2	Jakarta	Riverine	Floating	Macro	Posoft, Multilayer, Pohard			tonnes per day/year	2019	Van Emmerik, T., Loozen, M., Van Oeveren, K., Buschman, F., & Prinsen, G. (2019). Riverine plastic emission from Jakarta into the ocean. Environmental Research Letters, 14(8), 084033.	The Ocean Cleanup, Rotterdam, The Netherlands	Hydrology and Quantitative Water Management Group, Wageningen University, Wageningen, The Netherlands.	Deltares, Delft, The Netherlands						Riverine plastic emission from Jakarta into the ocean	Jakarta	-6.1123	106.785	-6.11264	106.752	-6.10521	106.969	-6.1102	106.941	-6.10851	106.907	-6.18886	106.81	-6.19223	106.87
3	Jakarta	Riverine	Floating	Macro	EPS			tonnes per day	2019	Cordova, M. R., & Nurhati, I. S. (2019). Major sources and monthly variations in the release of land-derived marine debris from the Greater Jakarta area, Indonesia. Scientific Reports, 9(1), 1-8.	Research Center for Oceanography, Indonesian Institute of Sciences (LIPI)								Major sources and monthly variations in the release of land-derived marine debris from the Greater Jakarta area, Indonesia	9 Rivers in Jakarta bay	-6.09231	106.709	-6.11663	106.773	-6.11231	106.785	-6.12554	106.83	-6.12131	106.863	-6.10881	106.907	-6.11008	106.941	-6.10529	106.969	-6.0912	106.995	-6.13201	106.846
4	Surabaya river	Riverine	Floating + Column	Micro	LDPE, PP, PS	Film, fragment	particles/m^3		2020	Lestari, P., Trihadiningrum, Y., Wijaya, B. A., Yunus, K. A., & Firdaus, M. (2020). Distribution of microplastics in Surabaya River, Indonesia. Science of The Total Environment, 138560.	Institut Teknologi Sepuluh Nopember, Kampus ITS Sukolilo,								Distribution of microplastics in Surabaya River, Indonesia	Surabaya River	-7.308.657	112.834.049
5	Cilacap region	Marine	Beach and floating	Macro + Micro	PP, LDPE, PP		particles/m^2 and particles/m^3		2017	Syakti, A. D., Bouhroum, R., Hidayati, N. V., Koenawan, C. J., Boulkamh, A., Sulistyo, I., ... & Wong-Wah-Chung, P. (2017). Beach macro-litter monitoring and floating microplastic in a coastal area of Indonesia. Marine Pollution Bulletin, 122(1-2), 217-225.	Center for Maritime Biosciences Studies – Institute for Sciences and Community Service, Jenderal Soedirman University, Kampus Karangwangkal, Jl. dr. Suparno, Purwokerto 53123, Indonesia	Fisheries and Marine Science Faculty-Jenderal Soedirman University, Kampus Karangwangkal, Jl. dr. Suparno, Purwokerto 53123, Indonesia	Marine Science and Fisheries Faculty, Raja Ali Haji Maritime University, Jl. Politeknik Senggarang-Tanjungpinang, Riau Islands Province 29100, Indonesia	Laboratoire des Techniques Innovantes de Préservation de l'Environnement, Université des Frères Mentouri (Constantine 1), 325 Route de Ain El Bey, 25017 Constantine, Algeria	Aix Marseille Université, CNRS, LCE, UMR 7376, 13545 Aix-en-Provence Cedex 4, France	Department of Chemistry, Sepuluh Nopember Institute of Technology, Surabaya, Indonesia			Beach macro-litter monitoring and floating microplastic in a coastal area of Indonesia	Cilacap Java	-7.696.243	109.059.156
6	Spermonde archipelago	Marine	Beach	Macro			item m^3/m^2		2018	Sur, C., Abbott, J. M., Ambo-Rappe, R., Asriani, N., Hameed, S. O., Jellison, B. M., ... & Satterthwaite, E. V. (2018). Marine debris on small islands: Insights from an educational outreach program in the Spermonde Archipelago, Indonesia. Frontiers in Marine Science, 5, 35.	Department of Environmental Science and Policy, University of California, Davis, Davis, CA, United States	Bodega Marine Laboratory, University of California at Davis, Bodega Bay, CA, United States	Department of Evolution and Ecology, University of California at Davis, Davis, CA, United States	Marine Science and Fisheries, Hasanuddin University, Makassar, Indonesia	Department of Mathematics, University of California at Davis, Davis, CA, United States				Marine Debris on Small Islands: Insights from an Educational Outreach Program in the Spermonde Archipelago, Indonesia	Spermonde Archipelago	-4.887.827	119.114.444
7	Jakarta bay	Marine	Floating	Macro + Micro				m/s	2019	Jasmin, H. H., Purba, N. P., Harahap, S. A., Pranowo, W. S., Syamsudin, M. L., & Faizala, I. (2019). The model of macro debris transport before reclamation and in existing condition in Jakarta Bay. Jurnal Ilmu dan Teknologi Kelautan Tropis, 11(1), 131-140.	1Marine Science Program, Universitas Padjadjaran	Marine Research Laboratory (MEAL), Universitas Padjadjaran	Marine Department of Fisheries and Marine Science Faculty, UNPAD	Marine Research Center, Research and Human Resources Agency, KKP					THE MODEL OF MACRO DEBRIS TRANSPORT BEFORE RECLAMATION AND IN EXISTING CONDITION IN JAKARTA BAY	Jakarta Bay	-6.050.013	106.844.842
8	Wonorejo river estuary	Marine	Beach	Macro	LDPE, PP, PS		g dry weight/m^2		2020	Kurniawan, S. B., & Imron, M. F. (2020). Initial Analysis of Plastic Debris Accumulation in the Estuary of Wonorejo River, Surabaya, Indonesia. In E3S Web of Conferences (Vol. 148, p. 07001). EDP Sciences.	1Department of Chemical and Bioprocess Engineering, Faculty of Engineering and Built Environment, Universiti Kebangsaan Malaysia, 43600 UKM Bangi, Selangor, Malaysia	Department of Environmental Engineering, Faculty of Civil, Environmental and Geo Engineering, Institut Teknologi Sepuluh Nopember, Kampus ITS Keputih, Sukolilo, Surabaya 60111, Indonesia	Study Program of Environmental Engineering, Department of Biology, Faculty of Science and Technology, Universitas Airlangga, Kampus C UNAIR, Jalan Mulyorejo, Surabaya 60115, Indonesia						Initial Analysis of Plastic Debris Accumulation in the Estuary of Wonorejo River, Surabaya, Indonesia	Wonorejo estuary	-7.305.716	112.844.287
9	Bintan island	Marine	Beach	Macro	LDPE, PS, PP				2019	Syakti, A. D., Jacob, M., Birrien, T., Suhana, M. P., Aziz, M. Y., Salim, A., ... & Louarn, G. (2019). Daily apportionment of stranded plastic debris in the Bintan Coastal area, Indonesia. Marine Pollution Bulletin, 149, 110609.	Marine Science and Fisheries Faculty – Raja Ali Haji Maritime University, Jl. Politeknik Senggarang-Tanjungpinang, Riau Islands Province, 29100, Indonesia	Center for Maritime Biosciences Studies – Institute for Sciences and Community Service, Jenderal Soedirman University, Kampus Karangwangkal, Jl. Dr. Suparno, Purwokerto, 53123, Indonesia	University of Nantes, Polytech, IMN - CNRS, UMR 6502, 44322, Nantes, France	Faculty of Mathematic and Natural Sciences, Institut Teknologi Bandung. Jl. Ganesha No. 10 Bandung, 40133, Indonesia	Science and Technology Faculty– Jakarta Islamic State University (UIN), Ciputat, Jakarta. Jl. Ir. H. Juanda No. 95 Ciputat, Tangerang, Selatan, 15412, Indonesia	Aix Marseille Université, CNRS, LCE, UMR 7376, 13545, Aix-en-Provence Cedex 4, France			Daily apportionment of stranded plastic debris in the Bintan Coastal area, Indonesia	Bintan Island	1.089.598	104.461.484
10	Wonorejo river estuary	Marine	Beach	Macro	LDPE, PET, PP		g/m^2		2019	Kurniawan, S. B., & Imron, M. F. (2019). Seasonal variation of plastic debris accumulation in the estuary of Wonorejo River, Surabaya, Indonesia. Environmental Technology & Innovation, 16, 100490.	Study Program of Waste Treatment Engineering, Department of Marine Engineering, Politeknik Perkapalan Negeri Surabaya, Jalan Teknik Kimia, Kampus ITS Keputih, Sukolilo, Surabaya 60111, Indonesia	Study Program of Environmental Engineering, Department of Biology, Faculty of Science and Technology, Universitas Airlangga, Kampus C UNAIR, Jalan Mulyorejo, Surabaya 60115, Indonesia							Seasonal variation of plastic debris accumulation in the estuary of Wonorejo River, Surabaya, Indonesia	Wonorejo estuary	-7.305.716	112.844.287
11	Dullah Island	Marine	Beach	Macro			items/25m^2		2020	Renjaan, E. A., Silubun, D. T., Latar, D. I., & Makailipessy, M. (2020, June). Beach orientation and exposure accumulate types of marine debris on the coast of Dullah Island, kei archipelago, Indonesia. In IOP Conference Series: Earth and Environmental Science (Vol. 517, No. 1, p. 012015). IOP Publishing.	Hydro-Oceanography Laboratory, Tual State Fisheries Polytechnic Langgur - Sathean Ring Road, km 6, P.o.Box 1001, Southeast Maluku Regency, Indonesia	Marine Biotechnology Laboratory Tual State Fisheries Polytechnic Langgur - Sathean Ring Road, km 6, P.o.Box 1001, Southeast Maluku Regency, Indonesia							Beach orientation and exposure accumulate types of marine debris on the coast of Dullah Island, kei archipelago, Indonesia	Dullah Island	-5.609.763	132.774.001
12	Banda Aceh city	Marine	Beach and floating	Macro			g/100m^2		2020	Ondara, K., & Dhiauddin, R. (2020). Indonesia Marine Debris: Banda Aceh Coastal Environment Identification. Jurnal Kelautan Tropis, 23(1), 117-126.	Research Institute for Coastal Resources and Vulnerability, Ministry of Marine Affairs and Fisheries Jl. Raya Padang-Painan km.16, Bungus, Padang City, West Sumatera								Indonesia Marine Debris: Banda Aceh Coastal Environment Identification	Banda Aceh	5.560.658	95.285.096
13	West coast Bali	Marine	Beach, sediment and floating	Macro			kg		2017	Husrin, S., Wisha, U. J., Prasetyo, R., Putra, A., & Attamimi, A. (2017). Characteristics of marine litters in the west coast of Bali. Jurnal Segara, 13(2).	Marine Research Centre, Ministry of Marine Affairs and Fisheries, Republic of Indonesia, Jakarta	)Research Institute for Coastal Resource and Vulnerability, Ministry of Marine Affairs and Fisheries, Republic of Indonesia, Padang	Biology Conservation Program, Dhyana Pura University, Bali	Faculty of Fisheries and Marine Science, Padjadjaran University Bandung					CHARACTERISTICS OF MARINE LITTERS IN THE WEST COAST OF BALI	Bali	-8.39708	114.62	-8.49912	114.968	-8.5912	115.072	-8.63435	115.101	-8.24687	114.381
14	Kuta beach, Bali	Marine	Beach	Macro				Flux	2014	Yunanto A. Suganda, E. Soesilo, TEB. & Hanggono, A. (2014). Modeling Abundance and Control of Litter on Kuta Beach, Bali, Indonesia, International Journal of Sciences: Basic and Applied Research (IJSBAR) (2014) Volume 15, No 1, pp 708-729									Modeling Abundance and Control of Litter on Kuta Beach, Bali, Indonesia	Kuta Beach Bali	-8.717.566	115.168.550
15	Makassar strait	Marine	Beach	Macro			items/m^2		2019	Isyrini, R., La Nafie, Y. A., Ukkas, M., Rachim, R., & Cordova, M. R. (2019, April). Marine macro debris from makassar strait beaches with three different designations. In IOP Conference Series: Earth and Environmental Science (Vol. 253, No. 1, p. 012039). IOP Publishing.	Department of Marine Science, Faculty of Marine Science and Fisheries, Universitas Hasanuddin, Makassar, Indonesia	Research Center for Oceanography, Indonesian Institute of Sciences, Jakarta, Indonesia							Marine Macro Debris from Makassar Strait Beaches with Three Different Designations	Makassar Strait	-4.08889	119.616
16	Central Java	Terrestrial	-	Macro				Flux	2020	Maryono, M., Seruyaningtyas, K., Roynaldi, A. D., Hastuti, C. M., & Rahma, N. N. (2020). Regional Model Development of Plastic Waste Monitoring: Basic Framework from Population and Public Market in Central Java-Indonesia. E&ES, 448(1), 012098.	Department of Urban and Regional Planning, Faculty of Engineering, Diponegoro University -Indonesia	Center for Green Infrastructure Resilience and Development (C-Greinde), Master Program of Environmental Science, School of Postgraduate, Diponegoro University-Indonesia	Department of Environmental Engineering, Faculty of Engineering, Diponegoro University -Indonesia	Department of Chemical Engineering, Faculty of Engineering, Diponegoro University -Indonesia					Regional Model Development of Plastic Waste Monitoring: Basic Framework from Population and Public Market in Central Java-Indonesia	Central Java	-7.335.083	109.453.258
17	-	Marine	Review	Micro				Flux	2017	Syakti, A. D. (2017). Microplastics monitoring in marine environment. Omni-Akuatika, 13(2).	Center for Maritime Biosciences Studies – Institute fo r Sciences and Community Service, Jenderal Soedirman University, Kampus Karangwangkal, Jl. dr. Suparno, Purwokerto 53123, Indonesia	Marine Science and Fisheries Faculty - Raja Ali Haji Maritime U niversity, Jl. Politeknik Senggarang-Tanjungpinang, Riau Islands Province, 29100, Indonesia							Microplastics Monitoring in Marine Environment	No Location	x	x
18	Southwestern Sumatran waters	Marine	Sediment	Micro		granules, fiber	particles per sample		2016	Cordova, M. R., & Wahyudi, A. (2016). Microplastic in the deep-sea sediment of southwestern Sumatran Waters. Marine Research in Indonesia, 41(1), 27-35.	Research Center for Oceanography (RCO). Indonesian Institute of Sciences.								MICROPLASTIC IN THE DEEP-SEA SEDIMENT OF SOUTHWESTERN SUMATRAN WATERS	South Sumatra	-5.717.693	104.428.154
19	Bantan Bay	Marine	Sediment	Micro	EPS, PET, PP	Foam, fragment, granules	particles per kg		2020	Falahudin, D., Cordova, M. R., Sun, X., Yogaswara, D., Wulandari, I., Hindarti, D., & Arifin, Z. (2020). The first occurrence, spatial distribution and characteristics of microplastic particles in sediments from Banten Bay, Indonesia. Science of The Total Environment, 705, 135304.	Research Center for Oceanography, Indonesian Institute of Sciences, Jl. Pasir Putih 1, Ancol Timur, Jakarta, Indonesia	Jiaozhou Bay National Marine Ecosystem Research Station, Institute of Oceanology, Chinese Academy of Sciences, Qingdao 266071, China	Center for Ocean Mega-Science, Chinese Academy of Sciences, Qingdao 266071, China						The first occurrence, spatial distribution and characteristics of microplastic particles in sediments from Banten Bay, Indonesia	Bantan Bay	-6.019.447	106.179.897
20	Bintan island	Marine	Floating	Micro	PP, LDPE, PE	Fragments, fibers, granules	particles/m^3		2018	Syakti, A. D., Hidayati, N. V., Jaya, Y. V., Siregar, S. H., Yude, R., Asia, L., ... & Doumenq, P. (2018). Simultaneous grading of microplastic size sampling in the Small Islands of Bintan water, Indonesia. Marine pollution bulletin, 137, 593-600.	Center for Maritime Biosciences Studies – Institute for Sciences and Community Service, Jenderal Soedirman University, Kampus Karangwangkal, Jl. dr. Suparno, Purwokerto 53123, Indonesia	Marine Science and Fisheries Faculty - Raja Ali Haji Maritime University, Jl. Politeknik Senggarang-Tanjungpinang, Riau Islands Province 29100, Indonesia	Fisheries and Marine Science Faculty-Jenderal Soedirman University, Kampus Karangwangkal, Jl. dr. Suparno, Purwokerto 53123, Indonesia	Marine Science and Fisheries Faculty – Riau University, Pekanbaru, Indonesia	Conservation Laboratoy – Banyan Tree Bintan Resort, Lagoi, Bintan, Indonesia	Nikoi and Cempedak Private Islands, Gunung Kijang Bintan, Indonesia	Aix Marseille Université, CNRS, LCE, UMR 7376, 13545 Aix-en-Provence Cedex 4, France		Simultaneous grading of microplastic size sampling in the Small Islands of Bintan water, Indonesia	Bintan Island	1.021.867	104.530.372
21	Surabaya	Marine	Floating	Micro	PS, PE, PP	Foams, fragments, granules	particles/l		2019	Cordova, M. R., Purwiyanto, A. I. S., & Suteja, Y. (2019). Abundance and characteristics of microplastics in the northern coastal waters of Surabaya, Indonesia. Marine pollution bulletin, 142, 183-188.	Research Center for Oceanography, Indonesian Institute of Sciences, Jl. Pasir Putih I, Jakarta 14430, Indonesia	Programme Study in Marine Science, Faculty of Mathematics and Natural Science, Sriwijaya University, Palembang, Indonesia	Marine Science Department, Marine and Fisheries Faculty, Udayana University, Jl. Raya Kampus Universitas Udayana, Bukit Jimbaran, Bali, Indonesia						Abundance and characteristics of microplastics in the northern coastal waters of Surabaya, Indonesia	Surabaya	-7.204.574	112.765.804
22	Java sea	Marine	Floating	Micro				m/s	2019	Handyman, D. I. W., Purba, N. P., Pranowo, W. S., Harahap, S. A., Dante, I. F., & Yuliadi, L. P. S. (2019). Microplastics Patch Based on Hydrodynamic Modeling in The North Indramayu, Java Sea. Polish Journal of Environmental Studies, 28(1).	Department of Marine Science, Padjadjaran University, West Java, Indonesia (Univrsitas Padjadjaran)	KOMITMEN Research Group, Padjadjaran University, West Java, Indonesia	Marine and Coastal Data Laboratory, Marine Research Center, Indonesian Ministry of Marine Affairs & Fisheries, Jakarta, Indonesia	Department of Hydrography Engineering, Indonesian Naval Postgraduate School (STTAL), Jakarta, Indonesia					Introduction Microplastics Patch Based on Hydrodynamic Modeling in The North Indramayu, Java Sea	Java Sea	-6.040.453	106.778.924
23	Sumba region	Marine	Column	Micro	PE, PP, PS		particles/m^3		2018	Cordova, M. R., & Hernawan, U. E. (2018, June). Microplastics in Sumba waters, East Nusa Tenggara. In IOP Conference Series: Earth and Environmental Science (Vol. 162, pp. 1-8). IOP Publishing.	Research Center for Oceanography, Indonesian Institute of Sciences, Jl. Pasir Putih I, Jakarta 14430, Indonesia								Microplastics in Sumba waters, East Nusa Tenggara	North Sumba	-9.129.786	118.886.714
24	Jaring Halus Village	Marine	Beach	Macro+Micro		Film, fiber, fragment	item/m^2, item/kg		2017	Bangun, A. P., Wahyuningsih, H., & Muhtadi, A. (2017). Impacts of macro-and microplastic on macrozoobenthos abundance in intertidal zone. International Confrence on Agriculture, Environtment, and Food security, Fakultas Pertanian USU.	Department of Aquatic Resources Management, Faculty of Agriculture, Universitas Sumatera Utara. Jl. Prof A. Sofyan No. 3, Medan 20155, North Sumatera, Indon esia	Department of Biology, Faculty of Mathematics and Natural Sciences, Universitas Sumatera Utara, Jl. Bioteknologi No. 1, Medan 20155, North Sumatera, Indonesi							Impacts of macro-and microplastic on macrozoobenthos abundance in intertidal zone	Jaring Halus	3.934.881	98.565.835
25	Jakarta bay	Marine	Beach	Micro	PP, PET,		particles/kg dry weight		2017	Manalu, A. A., Hariyadi, S., & Wardiatno, Y. (2017). Microplastics abundance in coastal sediments of Jakarta Bay, Indonesia. Aquaculture, Aquarium, Conservation & Legislation, 10(5), 1164-1173.	School of Natural Resources and Environmental Management, Bogor Agricultural University, Bogor, West Java, Indonesia;	Departement of Aquatic Resources Management, Faculty of Fisheries and Marine Sciences, Bogor Agricultural University, Bogor, West Java, Indonesia.							Microplastics abundance in coastal sediments of Jakarta Bay, Indonesia	Jakarta Bay	-6.050.013	106.844.842
26	Jagir estuary	Marine	Beach	Micro	PES, LDPE, PP	Fiber, film, fragment	particles/kg sediment		2020	Firdaus, M., Trihadiningrum, Y., & Lestari, P. (2020). Microplastic pollution in the sediment of Jagir Estuary, Surabaya City, Indonesia. Marine Pollution Bulletin, 150, 110790.	epartment of Environmental Engineering, Faculty of Civil, Planning, and Geo-engineering, Institut Teknologi Sepuluh Nopember, Kampus ITS Sukolilo, Surabaya 60111, Indonesia								Microplastic pollution in the sediment of Jagir Estuary, Surabaya City, Indonesia	Jagir estuary	-7.204.574	112.765.804
27	Muara Teluknaga	Marine	Column + Biota	Micro		Fiber, film	particles/l		2019	Rahmawati, N. H., & Patria, M. P. (2019, July). Microplastics Dissemination from Fish Mugil dussumieri and Mangrove Water of Muara Teluknaga, Tangerang, Banten. In Journal of Physics: Conference Series (Vol. 1282, No. 1, p. 012104). IOP Publishing.	Department of Biology, Faculty of Mathematics and Natural Science, Universitas Indonesia, Kampus UI Depok 16424, Indonesia								Microplastics Dissemination from Fish Mugil dussumieri and Mangrove Water of Muara Teluknaga, Tangerang, Banten	Muara Teluknaga	-6.05223	106.709
28	Lamongan	Marine	Beach	Micro		Fiber, fragment	particles/kg dry weight		2019	Asadi, M. A., Hertika, A. M. S., Iranawati, F., & Yuwandita, A. Y. (2019). Microplastics in the sediment of intertidal areas of Lamongan, Indonesia. Aquaculture, Aquarium, Conservation & Legislation, 12(4), 1065-1073.	Faculty of Fisheries and Marine Science, University of Brawijaya, Jalan Veteran, 65145, Malang, Indonesia								Microplastics in the sediment of intertidal areas of Lamongan, Indonesia	Lamongan	-6.87568	112.268
29	Makassar city	Marine	Floating	Micro				-	2019	Afdal, M., Werorilang, S., Faizal, A., & Tahir, A. (2019). Studies on Microplastics Morphology Characteristics in the Coastal Water of Makassar City, South Sulawesi, Indonesia. International Journal of Environment, Agriculture and Biotechnology, 4(4).	ep artement of M arine Science, Hasanuddin University, M akassar-Indonesia								Studies on Microplastics Morphology Characteristics in the Coastal Water of Makassar City, South Sulawesi, Indonesia	Makassar City	-5.16023	119.39
30	Makassar city	Marine	Biota	Micro		Fragment, foam	particles per fish		2015	Rochman, C. M., Tahir, A., Williams, S. L., Baxa, D. V., Lam, R., Miller, J. T., ... & Teh, S. J. (2015). Anthropogenic debris in seafood: Plastic debris and fibers from textiles in fish and bivalves sold for human consumption. Scientific reports, 5, 14340.	Aquatic Health Program, School of Veterinary Medicine, University of California, Davis, CA 95616, Davis, USA	Department of Marine Science, Faculty Marine and Fisheries Sciences, University of Hasanuddin, Makassar, 90245, Indonesia	Bodega Marine Laboratory and Department of Evolution and Ecology, University of California at Davis, Bodega Bay, CA 94923, USA						Anthropogenic debris in seafood: Plastic debris and fibers from textiles in fish and bivalves sold for human consumption		x	x
31	Thousand Islands archipelago	Marine	Column	Macro			-	-	1986	Willoughby, N. G. (1986). MAM-MADE FLOTSAM OH THE STRAND-LINES OF THE THOUSAND ISLANDS (KEPULAUAN SERIBU) JAKARTA, JAVA. UNESCO REPORTS IN MARINE SCIENCE, 157.									Willoughby, N. G. (1986b). MAM-MADE FLOTSAM OH THE STRAND-LINES OF THE THOUSAND ISLANDS (KEPULAUAN SERIBU) JAKARTA, JAVA. UNESCO REPORTS IN MARINE SCIENCE, 157.	Thousan Islands archipelago	-5.74707	106.613
32	Jayapure, Irian Jaya	Marine	Column	Macro			-	-	1991	Nash, A. D. (1991). Marine debris and fishing off irian jaya. Environmental Conservation, 18(1), 80-80.	WWF Irian Jaya								Nash, A. D. (1991). Marine debris and fishing off irian jaya. Environmental Conservation, 18(1), 80-80.	Jayapure, Irian Jaya	-2.55763	140.709
33	Ambon bay	Marine	Beach	Macro			-	-	1995	Evans, S. M., Dawson, M., Day, J., Frid, C. L. J., Gill, M. E., Pattisina, L. A., & Porter, J. (1995). Domestic waste and TBT pollution in coastal areas of Ambon Island (Eastern Indonesia). Marine Pollution Bulletin, 30(2), 109-115.	Department of Marine Sciences & Coastal Management, University of Newcastle upon Tyne, Newcastle upon Tyne NE1 7RU, UK								Evans, S. M., Dawson, M., Day, J., Frid, C. L. J., Gill, M. E., Pattisina, L. A., & Porter, J. (1995). Domestic waste and TBT pollution in coastal areas of Ambon Island (Eastern Indonesia). Marine Pollution Bulletin, 30(2), 109-115.	Ambon bay	-3.66029	128.167
34	Pulau Seribu, DKI, Jakarta	Marine	Beach	Macro			-	-	1997	Uneputty, P., & Evans, S. M. (1997a). The impact of plastic debris on the biota of tidal flats in Ambon Bay (eastern Indonesia). Marine Environmental Research, 44(3), 233-242.	epartment of Marine Sciences and Coastal Management, Newcastle University, Newcastle-upon-Tyne NE1 7RU, UK								Uneputty, P., & Evans, S. M. (1997a). The impact of plastic debris on the biota of tidal flats in Ambon Bay (eastern Indonesia). Marine Environmental Research, 44(3), 233-242.	Ambon bay	-3.64386	128.227
35	Pulau Seribu, DKI, Jakarta	Marine	Beach	Macro			-	-	1997	Uneputty, P. A., & Evans, S. M. (1997b). Accumulation of beach litter on islands of the Pulau Seribu Archipelago, Indonesia. Marine Pollution Bulletin, 34(8), 652-655.	epartment of Marine Sciences and Coastal Management, Newcastle University, Newcastle-upon-Tyne NE1 7RU, UK								Uneputty, P. A., & Evans, S. M. (1997b). Accumulation of beach litter on islands of the Pulau Seribu Archipelago, Indonesia. Marine Pollution Bulletin, 34(8), 652-655.	Pulau Seribu, DKI, Jakarta	-5.59698	106.554
36	Pulau Seribu, DKI, Jakarta	Marine	Beach	Macro	PS		-	-	1986	Willoughby, N. G. (1986). Man-made litter on the shores of the Thousand Island Archipelago, Java. Marine Pollution Bulletin, 17(5), 224-228.	Resident Adviser, UNDIP/Newcastle Link, Fisheries Department, Universitas Diponegoro, J1 Imam Barjo, 1–3, Semarang, Central Java, Indonesia.								Willoughby, N. G. (1986). Man-made litter on the shores of the Thousand Island Archipelago, Java. Marine Pollution Bulletin, 17(5), 224-228.	Pulau Seribu, DKI, Jakarta	-5.59698	106.554
37	Pantai Indah Kapuk	Marine	Mangrove	Macro + Micro		Film, fiber	item/m^2		2014	HASTUTI, A. R., YULIANDA, F., & WARDIATNO, Y. (2014). Spatial distribution of marine debris in mangrove ecosystem of pantai indah kapuk, Jakarta. Bonorowo Wetlands, 4(2), 94-107.	Departemen Manajemen Sumber Daya Perairan, Fakultas Perikanan dan Ilmu Kelautan, Institut Pertanian Bogor, Bogor 16680, Jawa Barat	Departemen Manajemen Sumber Daya Perairan, Fakultas Perikanan dan Ilmu Kelautan, Institut Pertanian Bogor, Bogor 16680, Jawa Barat							HASTUTI, A. R., YULIANDA, F., & WARDIATNO, Y. (2014). Spatial distribution of marine debris in mangrove ecosystem of pantai indah kapuk, Jakarta. Bonorowo Wetlands, 4(2), 94-107.	Pantai Indah Kapuk	-6.10189	106.744
38	Kuta beach, Bali	Marine	Column	Macro				kg/monsoon season	2015	Attamimi, A., Purba, N. P., Anggraini, S. R., & Harahap, S. A. (2015). Investigation of marine debris in Kuta Beach, Bali. Proceedings of Environmental Engineering and Water Technology, Integrated Water System and Governance (Malang, East Java, Indonesia), C1-7.	Marine Science Department, Padjadjaran University, FPIK-UNPAD Jatinangor Km. 21 UBR 40600 West Java, Indonesia	KOMITMEN Research Group, Padjadjaran University, FPIK-UNPAD Jatinangor Km. 21 UBR 40600 West Java, Indonesia	Loka Penelitian Sumber Daya dan Kerentanan Pesisir, Padang, West Sumatra, Indonesia *Corresponding author’s e-mail: adliattamimi@gmail.com						Attamimi, A., Purba, N. P., Anggraini, S. R., & Harahap, S. A. (2015). Investigation of marine debris in Kuta Beach, Bali. Proceedings of Environmental Engineering and Water Technology, Integrated Water System and Governance (Malang, East Java, Indonesia), C1-7.	Kuta beach, Bali	-8.71752	115.169
39	Muara Badak, East Bornea	Marine	Sediment	Micro		Fragment	particles/kg		2015	Dewi, I. S., Budiarsa, A. A., & Ritonga, I. R. (2015). Distribution of microplastic at sediment in the Muara Badak subdistrict, Kutai Kartanegara regency. Depik, 4(3), 121-131.	Konsentrasi Ilmu dan Teknologi Kelautan, Jurusan Manajemen Sumberdaya Perairan, Fakultas Perikanan dan Ilmu Kelautan, Universitas Mulawarman, Jl. Gunung Tabur No	Konsentrasi Ilmu dan Teknologi Kelautan, Jurusan Manajemen Sumberdaya Perairan, Fakultas Perikanan dan Ilmu Kelautan, Universitas Mulawarman, Jl. Gunung Tabur No 1, Kampus Gunung Kelua Samarinda, Kalimantan Timur 75123							Dewi, I. S., Budiarsa, A. A., & Ritonga, I. R. (2015). Distribution of microplastic at sediment in the Muara Badak subdistrict, Kutai Kartanegara regency. Depik, 4(3), 121-131.	Muara Badak, East Bornea	-0.357806	117.501
40	Biwak Island	Marine	Beach	Macro			kg/m^2		2018	Purba, N. P., Ihsan, Y. N., Faizal, I., Handyman, D. I., Widiastuti, K. S., Mulyani, P. G., ... & Hilmi, M. (2018b). Distribution of macro debris in savu sea marine national park (Kupang, Rote, and Ndana Beaches), East Nusa Tenggara, Indonesia. World News of Natural Sciences, 21, 64-76.	Marine Research Laboratory (MEAL), Universitas Padjadjaran, Jatinangor 45363, West Java, Indonesia	Divers Clean Action, Jakarta, Indonesia	National Marine Protected Area Agency, Kupang, East Nusa Tenggara, Indonesia						Purba, N. P., Ihsan, Y. N., Faizal, I., Handyman, D. I., Widiastuti, K. S., Mulyani, P. G., ... & Hilmi, M. (2018). Distribution of macro debris in savu sea marine national park (Kupang, Rote, and Ndana Beaches), East Nusa Tenggara, Indonesia. World News of Natural Sciences, 21, 64-76.	Biwak Island	-10.6877	123.09
41	Sekotong, Lombok	Marine	Sediment	Micro		Foam, fragment, granules	particles/kg		2018	Cordova, M. R., Hadi, T. A., & Prayudha, B. (2018). Occurrence and abundance of microplastics in coral reef sediment: a case study in Sekotong, Lombok-Indonesia. AES Bioflux, 10(1), 23-29.	Research Center for Oceanography - Indonesian Institute of Sciences (LIPI), Jl. Pasir Putih I, Jakarta 14430, Indonesia. Corresponding author: M. R. Cordova, muhammad.reza.cordova@lipi.go.id								Cordova, M. R., Hadi, T. A., & Prayudha, B. (2018). Occurrence and abundance of microplastics in coral reef sediment: a case study in Sekotong, Lombok-Indonesia. AES Bioflux, 10(1), 23-29.	Sekotong, Lombok	-8.74794	115.899
42	Untung Jawa Island, Jakarta	Marine	Mangrove	Macro			kg/m^2 and items/m^2		2018	Maharani, A., Purba, N. P., & Faizal, I. (2018). Occurrence of beach debris in Tunda Island, Banten, Indonesia. In E3S Web of Conferences (Vol. 47, p. 04006). EDP Sciences.	Komitmen Research Group, Padjajaran University, Indonesia	Marine Research Laboratory (MEAL), Padjajaran University, Indonesia	HIMAIKA-FPIK, Padjajaran University, Indonesia FPIK-UNPAD, Jl. Ir. Sukarno km. 21 West Java - INDONESIA						Maharani, A., Purba, N. P., & Faizal, I. (2018). Occurrence of beach debris in Tunda Island, Banten, Indonesia. In E3S Web of Conferences (Vol. 47, p. 04006). EDP Sciences.	Untung Jawa Island, Jakarta	-5.80922	106.276
43	15 Coastal Cities	Terrestrial + Riverine + Marine	Beach	Macro			hotspots		2018	Shuker, I. G., & Cadman, C. A. (2018). Indonesia-Marine debris hotspot rapid assessment: synthesis report (No. 126686, pp. 1-46). The World Bank.	World bank								Shuker, I. G., & Cadman, C. A. (2018). Indonesia-Marine debris hotspot rapid assessment: synthesis report (No. 126686, pp. 1-46). The World Bank.	15 Coastal Cities	x	x
44	Tambak Lorok coastal area, Java	Marine	Biota	Micro			particles per 0.25g		2018	Khoironi, A., & Anggoro, S. (2018). The existence of microplastic in Asian green mussels. E&ES, 131(1), 012050.	Doctoral Program Environmental Sciences of Diponegoro University, Semarang, Indonesia)	Doctoral Program Environmental Sciences of Diponegoro University, Semarang, Indonesia; Faculty of Fisheris and Marine Science of Diponegoro University, Semarang, Indonesia)	Doctoral Program Environmental Sciences of Diponegoro University, Semarang, Indonesia; Environmental Engineering Departement of Diponegoro University, Semarang, Indonesia)						Khoironi, A., & Anggoro, S. (2018). The existence of microplastic in Asian green mussels. E&ES, 131(1), 012050.	Tambak Lorok coastal area, Java	-6.94485	110.432
45	Pacific ocean	Marine	Column	Micro				km/year	2018	Ramos, A., Purba, N. P., Faizal, I., Mulyani, Y., & Syamsuddin, M. L. (2018). Microplastic tracking from Pacific garbage to Northern Indonesia Sea. Jurnal Perspektif Pembiayaan dan Pembangunan Daerah, 6(1), 87-96.	Marine Science Program, Universitas Padjadjaran, Indonesia								Ramos, A., Purba, N. P., Faizal, I., Mulyani, Y., & Syamsuddin, M. L. (2018). Microplastic tracking from Pacific garbage to Northern Indonesia Sea. Jurnal Perspektif Pembiayaan dan Pembangunan Daerah, 6(1), 87-96.	Pacific ocean	x	x
46	Banyuurip	Marine	Surface	Micro		Fragment, fiber, film	Particles/m^3		2019	Ayuingtyas, W. C., Yona, D., Julinda, S. H., & Iranawati, F. (2019). Kelimpahan Mikroplastik Pada Perairan Di Banyuurip, Gresik, Jawa Timur. JFMR (Journal of Fisheries and Marine Research), 3(1), 41-45.	Program Studi Ilmu Kelautan, Fakultas Perikanan dan Ilmu Kelautan,	Marine Resource Explore Management (MEXMA) Research Group, Fakultas Perikanan dan Ilmu Kelautan, Universitas Brawijaya, Malang, Jalan Veteran, Kode Pos 65145 Malang							Ayuingtyas, W. C., Yona, D., Julinda, S. H., & Iranawati, F. (2019). Kelimpahan Mikroplastik Pada Perairan Di Banyuurip, Gresik, Jawa Timur. JFMR (Journal of Fisheries and Marine Research), 3(1), 41-45.	Banyuurip	-6.89399	112.53
47	Central Java	Marine	Beach	Micro		Fiber	particles/25g dry sample		2016	Balasubramaniam, M. A. T. H. U. R. A., & Phillott, A. D. (2016). Preliminary observations of microplastics from beaches in the Indian ocean. Indian Ocean Turtle Newsletter, 23, 13-16.	Asian University for Women, Chittagong, Bangaldesh								Balasubramaniam, M. A. T. H. U. R. A., & Phillott, A. D. (2016). Preliminary observations of microplastics from beaches in the Indian ocean. Indian Ocean Turtle Newsletter, 23, 13-16.	Central Java	-6.94022	110.477
48	Bali, East Java, Komodo	Marine	Floating	Micro		Film, fragment	pieces/m^3 and pieces/km^2		2019	Germanov, E. S., Marshall, A. D., Hendrawan, I. G., Admiraal, R., Rohner, C. A., Argeswara, J., ... & Loneragan, N. R. (2019). Microplastics on the menu: Plastics pollute Indonesian Manta Ray and Whale Shark feeding grounds. Frontiers in Marine Science, 6, 679.	Environmental and Conservation Sciences, Murdoch University, Perth, WA, Australia	arine Megafauna Foundation, Truckee, CA, United States	Aquatic Megafauna Research Unit, Centre for Sustainable Aquatic Ecosystems, Harry Butler Institute, Murdoch University, Perth, WA, Australia	Department of Marine Science, Faculty of Marine Sciences and Fisheries, Udayana University, Denpasar, Indonesia	chool of Mathematics and Statistics, Victoria University of Wellington, Wellington, New Zealand	Department of Mathematics and Statistics, Murdoch University, Perth, WA, Australia	Fisheries and Marine Science Department, Faculty of Agriculture, Mataram University, Mataram, Indonesia	Faculty of Fisheries and Marine Science, Bogor Agricultural University, Bogor, Indonesia	Germanov, E. S., Marshall, A. D., Hendrawan, I. G., Admiraal, R., Rohner, C. A., Argeswara, J., ... & Loneragan, N. R. (2019). Microplastics on the menu: Plastics pollute Indonesian Manta Ray and Whale Shark feeding grounds. Frontiers in Marine Science, 6, 679.	Bali, East Java, Komodo	-8.52988	119.577
49	Jakarta	Marine	Biota	Micro		Fibers, fragments	particles per fish		2019	HASTUTI, A. R., LUMBANBATU, D. T., & WARDIATNO, Y. (2019). The presence of microplastics in the digestive tract of commercial fishes off Pantai Indah Kapuk coast, Jakarta, Indonesia. Biodiversitas Journal of Biological Diversity, 20(5).	Program in Aquatic Resources Management, Graduate School, Institut Pertanian Bogor. Jl. Raya Dramaga, Kampus IPB Darmaga, Bogor 16680, West Java, Indonesia.  email: ramadhiniayu@gmail.com.	Department of Aquatic Resources Management, Faculty of Fisheries and Marine Sciences, Institut Pertanian Bogor. Jl. Raya Dramaga, Kampus IPB Darmaga, Bogor 16680, West Java, Indonesia.	Environmental Research Center (PPLH-IPB), Institut Pertanian Bogor. Jl. Raya Dramaga, Kampus IPB Darmaga, Bogor 16680, West Java, Indonesia.  email: yusli@ipb.ac.id.	Center for Coastal and Marine Resources Studies (PKSPL-IPB), Institut Pertanian Bogor. Jl. Raya Pajajaran, Kampus IPB Baranangsiang, Bogor 16143, West Java, Indonesia.					HASTUTI, A. R., LUMBANBATU, D. T., & WARDIATNO, Y. (2019). The presence of microplastics in the digestive tract of commercial fishes off Pantai Indah Kapuk coast, Jakarta, Indonesia. Biodiversitas Journal of Biological Diversity, 20(5).	Jakarta	-6.10008	106.743
50	Savu sea	Marine	Floating	Micro		Fibers, films, fragments	particles/m^3		2019	Hiwari, H., Purba, N. P., Ihsan, Y. N., Yuliadi, L. P. S., & Mulyani, P. G. (2019). Kondisi sampah mikroplastik di permukaan air laut sekitar Kupang dan Rote, Provinsi Nusa Tenggara Timur. Pros Sem Nas Masy Biodiv Indon, 5(2), 165-171.									Hiwari, H., Purba, N. P., Ihsan, Y. N., Yuliadi, L. P. S., & Mulyani, P. G. (2019). Kondisi sampah mikroplastik di permukaan air laut sekitar Kupang dan Rote, Provinsi Nusa Tenggara Timur. Pros Sem Nas Masy Biodiv Indon, 5(2), 165-171.	Savu sea	-10.5301	123.387
51	Biawak island	Marine	Biota	Micro			particles per fish		2018	Ismail, M. R., Lewaru, M. W., & Prihadi, D. J. (2018). Microplastics ingestion by fish in the Biawak Island. World Scientific News, 106, 230-237.	Marine Science Departement, Fisheries and Marine Science Faculty, Padjadjaran University, Jl. Raya Bandung Sumedang KM 21, Jatinangor 40600, Indonesia								Ismail, M. R., Lewaru, M. W., & Prihadi, D. J. (2018). Microplastics ingestion by fish in the Biawak Island. World Scientific News, 106, 230-237.	Biawak island	-8.32708	121.742
52	Pangandaran bay	Marine	Biota	Micro		Fragment, fiber, film	particles per fish		2019	Ismail, M. R., Lewaru, M. W., & Prihadi, D. J. (2019). Microplastics ingestion by fish in the Pangandaran bay, Indonesia. World News of Natural Sciences. An International Sientific Journal, 23.	Marine Science Departement, Fisheries and Marine Science Faculty, Padjadjaran University, Jatinangor, Indonesia								Ismail, M. R., Lewaru, M. W., & Prihadi, D. J. (2019). Microplastics ingestion by fish in the Pangandaran bay, Indonesia. World News of Natural Sciences. An International Sientific Journal, 23.	Pangandaran bay	-7.69407	108.661
53	Labuange beach	Marine	Beach	Macro					2018	Isyrini et al. (2018). Beach debris on Labuange Beach, Barru District, South Sulawesi Province, Malaysia. SPERMONDE 4(2): 74-80.	Department of Marine Science. Faculty of Marine Science and Fisheries, Hasanuddin University	Research Center for Oceanography, Indonesian Institute of Sciences. Jl. PasirPutih 1. Ancol Timur. Jakarta Utara, Indonesia, 14430.							Isyrini et al. (2018). Beach debris on Labuange Beach, Barru District, South Sulawesi Province, Malaysia. SPERMONDE 4(2): 74-80.	Labuange beach	-4.19127	119.628
54	Tanjungpinang	Marine	Floating	Micro			pieces/m^3		2019	Lubis, I. E. N., Melani, W. R., & Syakti, A. D. (2019, April). Plastic debris contamination in Grey-eel catfish (Plotosus canius) in Tanjungpinang water, Riau Islands-Indonesia. In AIP Conference Proceedings (Vol. 2094, No. 1, p. 020035). AIP Publishing LLC.									Lubis, I. E. N., Melani, W. R., & Syakti, A. D. (2019, April). Plastic debris contamination in Grey-eel catfish (Plotosus canius) in Tanjungpinang water, Riau Islands-Indonesia. In AIP Conference Proceedings (Vol. 2094, No. 1, p. 020035). AIP Publishing LLC.	Tanjungpinang	0.896868	104.467
55	Banda sea	Marine	review	Macro + Micro			-	-	2018	Manullang, C. Y. (2018, August). Current Status and Future Prospect of Marine Pollution Research in the Banda Sea. In Jurnal of International Symposium on Banda Sea Ecosystem. doi (Vol. 10, pp. 1755-1315).									Manullang, C. Y. (2018, August). Current Status and Future Prospect of Marine Pollution Research in the Banda Sea. In Jurnal of International Symposium on Banda Sea Ecosystem. doi (Vol. 10, pp. 1755-1315).	Banda sea	-	-
56	Biawak island	Marine	Beach	Macro			kg/km		2017	Purba, N. P., Syamsuddin, M. L., Sandro, R., Pangestu, I. F., & Prasetio, M. R. (2017). Distribution of Marine Debris in Biawak Island, West Java, Indonesia. World Scientific News, (66), 281-292.									Purba, N. P., Syamsuddin, M. L., Sandro, R., Pangestu, I. F., & Prasetio, M. R. (2017). Distribution of Marine Debris in Biawak Island, West Java, Indonesia. World Scientific News, (66), 281-292.	Biawak island	-6.00455	106.781
57	Pangandaran beach	Marine	Beach	Macro					2018	Purba, N. P., Apriliani, I. M., Dewanti, L. P., Herawati, H., & Faizal, I. (2018b). Distribution of macro debris at Pangandaran Beach, Indonesia. World Scientific News, 103, 144-156.									Purba, N. P., Apriliani, I. M., Dewanti, L. P., Herawati, H., & Faizal, I. (2018). Distribution of macro debris at Pangandaran Beach, Indonesia. World Scientific News, 103, 144-156.	Pangandaran beach	-7.69469	108.652
58	-	Marine	Review	Macro			-	-	2019	Purba, N. P., Handyman, D. I., Pribadi, T. D., Syakti, A. D., Pranowo, W. S., Harvey, A., & Ihsan, Y. N. (2019a). Marine debris in Indonesia: A review of research and status. Marine pollution bulletin, 146, 134-144.	Marine Research Laboratory (MEAL), University of Padjadjaran, Indonesia	Biology Department, University of Padjadjaran, Indonesia	Marine Science and Fishery Faculty, University of Raja Ali Haji Maritime, Indonesia	Marine and Coastal Data Laboratory, Ministry of Marine and Fishery Affairs, Indonesia	MantaWatch, United Kingdom				Purba, N. P., Handyman, D. I., Pribadi, T. D., Syakti, A. D., Pranowo, W. S., Harvey, A., & Ihsan, Y. N. (2019a). Marine debris in Indonesia: A review of research and status. Marine pollution bulletin, 146, 134-144.	-	-	-
59	Savu sea	Marine	Floating	Micro				m/s	2019	Purba, N. P., Pranowo, W. S., Simanjuntak, S. M., Faizal, I., Jasmin, H. H., Handyman, D. I., & Mulyani, P. G. (2019b). Trajectory of microplastics at Savu Sea Marine National Park, East Nusa Tenggara.	Departemen Kelautan, Fakultas Perikanan dan Ilmu Kelautan, Universitas Padjadjaran, Jl. Ir. Sukarno Km. 21, Bandung, Jawa Barat 40600, Indonesia	u Kelautan, Universitas Padjadjaran, Jl. Ir. Sukarno Km. 21, Bandung, Jawa Barat 40600, Indonesia; 2Pusat Riset Kelautan, Kementerian Perikanan dan Kelautan, Jl. Pasir Putih II, Ancol Timur, Jakarta, 14430, Indonesia	Sekolah Tinggi Teknologi Angkatan Laut (STTAL), Jl. Pantai Kuta, Ancol, 14430, Jakarta, Indonesia;	Program Studi Ilmu Kelautan, Universitas Padjadjaran, Jl. Ir. Sukarno Km. 21, Bandung, Jawa Barat 40600, Indonesia					Purba, N. P., Pranowo, W. S., Simanjuntak, S. M., Faizal, I., Jasmin, H. H., Handyman, D. I., & Mulyani, P. G. (2019b). Trajectory of microplastics at Savu Sea Marine National Park, East Nusa Tenggara.	Savu sea	-10.2934	122.003
60	Jakarta	Marine	Column	Micro		Fragment, filament, foam	g		2019	Rahmat, S. L., Purba, N. P., Agung, M. U., & Yuliadi, L. P. (2019). Karakteristik sampah mikroplastik di Muara Sungai DKI Jakarta. DEPIK Jurnal Ilmu-Ilmu Perairan, Pesisir dan Perikanan, 8(1), 9-17.	Rachmat, S. L. J., Purba, N. P., Agung, M. U. K., & Yuliadi, L. P. S. (2019). Characteristic of microplastic debris at estuary of DKI Jakarta. Jurnal Ilmu-Ilmu Perairan, Pesisir dan Perikanan, 8(1), 9-17.	Rachmat, S. L. J., Purba, N. P., Agung, M. U. K., & Yuliadi, L. P. S. (2019). Characteristic of microplastic debris at estuary of DKI Jakarta. Jurnal Ilmu-Ilmu Perairan, Pesisir dan Perikanan, 8(1), 9-17.	Rachmat, S. L. J., Purba, N. P., Agung, M. U. K., & Yuliadi, L. P. S. (2019). Characteristic of microplastic debris at estuary of DKI Jakarta. Jurnal Ilmu-Ilmu Perairan, Pesisir dan Perikanan, 8(1), 9-17.						Rahmat, S. L., Purba, N. P., Agung, M. U., & Yuliadi, L. P. (2019). Karakteristik sampah mikroplastik di Muara Sungai DKI Jakarta. DEPIK Jurnal Ilmu-Ilmu Perairan, Pesisir dan Perikanan, 8(1), 9-17.	Jakarta	-6.10892	106.842
61	4 ports	Marine	Floating	Macro			-	-	2018	Richardson, K., Gunn, R., Wilcox, C., & Hardesty, B. D. (2018). Understanding causes of gear loss provides a sound basis for fisheries management. Marine Policy, 96, 278-284.	University of Tasmania, Commonwealth Scientific and Industrial Research Organisation, Oceans and Atmosphere (CSIRO), A: 3-4 Castray Esplanade, Hobart, TAS 7000, Australia	GhostNets Australia, A: PO Box 619, Ravenshoe, QLD 4888, Australia	Commonwealth Scientific and Industrial Research Organisation, Oceans and Atmosphere (CSIRO), A: Oceans and Atmosphere, CSIRO, Hobart, Tasmania, Australia						Richardson, K., Gunn, R., Wilcox, C., & Hardesty, B. D. (2018). Understanding causes of gear loss provides a sound basis for fisheries management. Marine Policy, 96, 278-284.	4 ports	-	-
62	Takalar district	Marine	Beach	Macro			kg/m^2		2019	Tahir, A., Werorilangi, S., Isman, F. M., Zulkarnaen, A., Massinai, A., & Faizal, A. (2019). SHORT-TERM OBSERVATION ON MARINE DEBRIS AT COASTAL AREAS OF TAKALAR DISTRICT AND MAKASSAR CITY, SOUTH SULAWESI-INDONESIA. Jurnal Ilmu Kelautan SPERMONDE, 4(2).									Tahir, A., Werorilangi, S., Isman, F. M., Zulkarnaen, A., Massinai, A., & Faizal, A. (2019). SHORT-TERM OBSERVATION ON MARINE DEBRIS AT COASTAL AREAS OF TAKALAR DISTRICT AND MAKASSAR CITY, SOUTH SULAWESI-INDONESIA. Jurnal Ilmu Kelautan SPERMONDE, 4(2).	Takalar district	-4.72181	119.505
63	Spermonde archipelago	Marine	Sediment	Micro			particles/100g dry weight		2019	Tahir, A., Samawi, M. F., Sari, K., Hidayat, R., Nimzet, R., Wicaksono, E. A., ... & Werorilangi, S. (2019, October). Studies on microplastic contamination in Seagrass beds at Spermonde Archipelago of Makassar Strait, Indonesia. In Journal of Physics: Conference Series (Vol. 1341, No. 2, p. 022008). IOP Publishing.	Department of Marine Science, Universitas Hasanuddin, Makassar-Indonesia	Department of Fisheries, Universitas Hasanuddin, Makassar-Indonesia	Center for Environmental Research and Development, Universitas Hasanuddin, Makassar-Indonesia						Tahir, A., Samawi, M. F., Sari, K., Hidayat, R., Nimzet, R., Wicaksono, E. A., ... & Werorilangi, S. (2019, October). Studies on microplastic contamination in Seagrass beds at Spermonde Archipelago of Makassar Strait, Indonesia. In Journal of Physics: Conference Series (Vol. 1341, No. 2, p. 022008). IOP Publishing.	Spermonde Archipelago	-4.87803	119.115
64	Jaring Halus Village	Marine	Beach	Macro + Micro			% kg		2018	Wahyuningsih, H., Bangun, A. P., & Muhtadi, A. (2018). The relation of sediment texture to macro-and microplastic abundance in intertidal zone. IOP Confence Series: Earth and Environmental Science, 122(1), 012101.	Department of Biology, Faculty of Mathematics and Natural Sciences, Universitas Sumatera Utara, Jl. Bioteknologi No. 1, Medan 20155, North Sumatera, Indonesia	Department of Aquatic Resources Management, Faculty of Agriculture, Universitas Sumatera Utara, Jl. Prof A. Sogyan No. 3, Medan 20155, North Sumatera, Indonesia.							Wahyuningsih, H., Bangun, A. P., & Muhtadi, A. (2018). The relation of sediment texture to macro-and microplastic abundance in intertidal zone. IOP Confence Series: Earth and Environmental Science, 122(1), 012101.	Jaring Halus	3.934.881	98.565.835
65	East Java sea	Marine	Sediment	Micro		Fragment, fibers, films	particles/kg		2019	Yona, D., Sari, S. H. J., Iranawati, F., Bachri, S., & Ayuningtyas, W. C. (2019). Microplastics in the surface sediments from the eastern waters of Java Sea, Indonesia. F1000Research, 8.	Marine Science Department, Faculty of Fisheries and Marine Science, Brawijaya University, Malang, Jawa Timur, 65145, Indonesia	Marine Resources Exploration and Management (MEXMA) Research Group, Brawijaya University, Malang, Jawa Timur, 65145, Indonesia	Geography Department, Faculty of Social Science, State University of Malang, Malang, Jawa Timur, 65145, Indonesia						Yona, D., Sari, S. H. J., Iranawati, F., Bachri, S., & Ayuningtyas, W. C. (2019). Microplastics in the surface sediments from the eastern waters of Java Sea, Indonesia. F1000Research, 8.	East Java sea	-6.88462	112.518
66	Sahaong Bay	Marine	Beach, sediment and floating	Macro			-	-	2020	Lott, C., Eich, A., Unger, B., Makarow, D., Battagliarin, G., Schlegel, K., ... & Weber, M. (2020). Field and mesocosm methods to test biodegradable plastic film under marine conditions. bioRxiv.	HYDRA Marine Sciences GmbH, Sinzheim, Germany	BASF SE, Ludwigshafen, Germany	UNSRAT, Manado, Sulawesi Utara, Indonesia						Lott, C., Eich, A., Unger, B., Makarow, D., Battagliarin, G., Schlegel, K., ... & Weber, M. (2020). Field and mesocosm methods to test biodegradable plastic film under marine conditions. bioRxiv.	Sahaong Bay	1.74325	125.152
67	Manado bay	Marine	Beach	Macro					2020	Pane, L. R., Pelle, W. E., Undap, S. J., Rumampuk, N. D., Warouw, V., Mamuaja, J. M., & Lasut, M. T. (2020). Jenis, komposisi, dan kepadatan sampah laut di Teluk Manado, Sulawesi Utara, pada musim hujan (Type, composition, and density of marine litter in Manado Bay during rainy season). AQUATIC SCIENCE & MANAGEMENT, 8(1), 1-7.	Program Studi Magister Ilmu Perairan, Fakultas Perikanan dan Ilmu Kelautan, Universitas Sam Ratulangi, Jl.Kampus Unsrat Bahu, Manado 95115, Sulawesi Utara, Indonesia	Fakultas Perikanan dan Ilmu Kelautan, Universitas Sam Ratulangi, Jl.Kampus Unsrat Bahu, Manado 95115, Sulawesi Utara, Indonesia.							Pane, L. R., Pelle, W. E., Undap, S. J., Rumampuk, N. D., Warouw, V., Mamuaja, J. M., & Lasut, M. T. (2020). Jenis, komposisi, dan kepadatan sampah laut di Teluk Manado, Sulawesi Utara, pada musim hujan (Type, composition, and density of marine litter in Manado Bay during rainy season). AQUATIC SCIENCE & MANAGEMENT, 8(1), 1-7.	Manado bay	1.48943	124.836
68	Coral triangle	Marine	Review	Macro			-	-	2018	Lasut, M. T., Weber, M., Pangalila, F., Rumampuk, N. D., Rimper, J. R., Warouw, V., ... & Lott, C. (2018). From coral triangle to trash triangle—how the hot spot of global marine biodiversity is threatened by plastic waste. In Proceedings of the International Conference on Microplastic Pollution in the Mediterranean Sea (pp. 107-113). Springer, Cham.	Faculty of Fisheries and Marine Sciences, Sam Ratulangi University, Jalan Kampus UNSRAT, Bahu, Manado 95115, North Sulawesi, Indonesia	HYDRA Institute for Marine Sciences, Elba Field Station, Via del Forno 80, 57034 Campo nell’Elba, Livorno, Italy	De La Salle Catholic University, Manado, Indonesia						Lasut, M. T., Weber, M., Pangalila, F., Rumampuk, N. D., Rimper, J. R., Warouw, V., ... & Lott, C. (2018). From coral triangle to trash triangle—how the hot spot of global marine biodiversity is threatened by plastic waste. In Proceedings of the International Conference on Microplastic Pollution in the Mediterranean Sea (pp. 107-113). Springer, Cham.	Coral triangle	-	-
69	Untung Jawa Island, Jakarta	Marine	Mangrove	Macro			items per 100m^2		2017	Maharani, A., Handyman, D.I., Salafy, A., Nurrahman, Y., Purba, N.P. 2017. Macro Debris Condition in Mangrove Untung Java Island, Kepulauan Seribu. Seminar Nasional Geomatika 2017: Inovasi Teknologi Penyediaan Informasi Geospasial untuk Pembangunan Berkelanjutan	Komitmen Research Group	HIMAIKA	Ilmu Kelautan Universitas Padjadjaran						Maharani, A., Handyman, D.I., Salafy, A., Nurrahman, Y., Purba, N.P. 2017. Macro Debris Condition in Mangrove Untung Java Island, Kepulauan Seribu. Seminar Nasional Geomatika 2017: Inovasi Teknologi Penyediaan Informasi Geospasial untuk Pembangunan Berkelanjutan	Untung Jawa Island, Jakarta	-5.80922	106.276
70	Musi river	Riverine	Column	Micro	PP, PE, PES		particles/l		2020	Purwiyanto, A.I.S., Suteja, Y., Trisno, Ningrum, P.S., Putri, W.A.E., Rozirwan, Agustriani, F., Fauziyah, Cordova, M.R., Koropitan, A.F., 2020. Concentration and adsorption of Pb and Cu in microplastics: Case study in aquatic environment. Mar. Pollut. Bull. 158, 111380. https://doi.org/https://doi.org/10.1016/j.marpolbul.2020.111380	Marine Science Department, Mathematics and Natural Science Faculty, Sriwijaya University, Palembang, Indonesia	Marine Science Department, Marine Science and Fisheries Faculty, Udayana University, Jl, Raya Kampus Universitas Udayana, Bukit Jimbaran, Bali, Indonesia	Research Center for Oceanography, Indonesian Institute of Sciences, Jl. Pasir Putih I, Jakarta 14430, Indonesia	Department of Marine Sciences and Technology, IPB University, Bogor, Indonesia					Purwiyanto, A.I.S., Suteja, Y., Trisno, Ningrum, P.S., Putri, W.A.E., Rozirwan, Agustriani, F., Fauziyah, Cordova, M.R., Koropitan, A.F., 2020. Concentration and adsorption of Pb and Cu in microplastics: Case study in aquatic environment. Mar. Pollut. Bull. 158, 111380. https://doi.org/https://doi.org/10.1016/j.marpolbul.2020.111380	Musi river	-2.67804	104.961
71	Citarum river	Riverine	Column + Sediment + Biota	Micro	PE, PP		particles/m^3 or ^2 particles/fish		2020	Sembiring, E., Fareza, A.A., Suendo, V., Reza, M., 2020. The Presence of Microplastics in Water, Sediment, and Milkfish (Chanos chanos) at the Downstream Area of Citarum River, Indonesia. Water, Air, Soil Pollut. 231, 355. https://doi.org/10.1007/s11270-020-04710-y	Environmental Engineering Department, Bandung Institute of Technology, Bandung, 40132, Indonesia								Sembiring, E., Fareza, A.A., Suendo, V., Reza, M., 2020. The Presence of Microplastics in Water, Sediment, and Milkfish (Chanos chanos) at the Downstream Area of Citarum River, Indonesia. Water, Air, Soil Pollut. 231, 355. https://doi.org/10.1007/s11270-020-04710-y	Citarum river	-5.99686	107.045
72	Papua outer islands	Marine	Biota	Micro		Fiber	particles/g dry weight		2020	Yona, D., Maharani, M.D., Cordova, M.R., Elvania, Y., Dharmawan, I.W.E., 2020. Analisis mikroplastik di insang dan saluran pencernaan ikan karang di tiga pulau kecil dan terluar Papua, Indonesia: kajian awal. J. Ilmu dan Teknol. Kelaut. Trop. 12, 497–507. https://doi.org/https://doi.org/10.29244/jitkt.v12i2.25971	1Program Studi Ilmu Kelautan, FPIK-UB, Malang, 65145, Indonesia	2MEXMA Research Group, FPIK-UB, Malang, 65145, Indonesia	Pusat Penelitian Oseanografi (P2O)-LIPI, Jakarta, 14430, Indonesia						Yona, D., Maharani, M.D., Cordova, M.R., Elvania, Y., Dharmawan, I.W.E., 2020. Analisis mikroplastik di insang dan saluran pencernaan ikan karang di tiga pulau kecil dan terluar Papua, Indonesia: kajian awal. J. Ilmu dan Teknol. Kelaut. Trop. 12, 497–507. https://doi.org/https://doi.org/10.29244/jitkt.v12i2.25971	Papua outer islands	-0.757572	135.301
73	Bali	Marine + Riverine	Beach + riverbank	Macro			kg/m^2 and items/m^2		2020	Widyarsana, I.M.W., Damanhuri, E., Ulhusna, N., Agustina, E., 2020. A Preliminary Study: Identification of Stream Waste Quantity and Composition in Bali Province, Indonesia. E3S Web Conf. 148.	Faculty of Civil and Environmental Engineering, Bandung Institute of Technology, Indonesia								Widyarsana, I.M.W., Damanhuri, E., Ulhusna, N., Agustina, E., 2020. A Preliminary Study: Identification of Stream Waste Quantity and Composition in Bali Province, Indonesia. E3S Web Conf. 148.	Bali	-8.34645	115.107
74	Aceh river	Riverine	Floating	Macro					2020	Agustina, S., S.P. Nuraini, S. Purnawan, E.E.W. Siregar. Identifikasi awal sampah apung anorganik di muara Sungai Krueng Aceh, Kota Banda Aceh. Depik Jurnal Ilmu-Ilmu Perairan, Pesisir dan Perikanan, 9(1): 131-140.	Program Studi Ilmu Kelautan, Fakultas Kelautan dan Perikanan, Universitas Syiah Kuala, Jalan Meureubo, Kopelma Darussalam, Kota Banda Aceh 23111	Laboratorium Kimia Laut dan Bioteknologi Perikanan, Fakultas Kelautan dan Perikanan, Universitas Syiah Kuala, Jalan Meureubo, Kopelma Darussalam, Kota Banda Aceh 23111							Agustina, S., S.P. Nuraini, S. Purnawan, E.E.W. Siregar. Identifikasi awal sampah apung anorganik di muara Sungai Krueng Aceh, Kota Banda Aceh. Depik Jurnal Ilmu-Ilmu Perairan, Pesisir dan Perikanan, 9(1): 131-140.	Aceh river	5.58016	95.325
75	Bali strait	Marine	Floating	Micro		fiber film, fragment	particles/m^3		2019	D. Yona et al., "Microplastic in The Bali Strait: Comparison of Two Sampling Methods," ILMU KELAUTAN: Indonesian Journal of Marine Sciences, vol. 24, no. 4, pp. 153-158, Dec. 2019. https://doi.org/10.14710/ik.ijms.24.4.153-158	Marine Science Department, Fisheries and Marine Sciences Faculty, Brawijaya University	Marine Resources Exploration and Management Research Group, Fisheries and Marine Sciences Faculty, Brawijaya University Jl. Veteran, Malang, East Java, 65151,Indonesia	3Institute for Marine Research and Observation Jl. Baru Perancak Negara, Bali Indonesia						D. Yona et al., "Microplastic in The Bali Strait: Comparison of Two Sampling Methods," ILMU KELAUTAN: Indonesian Journal of Marine Sciences, vol. 24, no. 4, pp. 153-158, Dec. 2019. https://doi.org/10.14710/ik.ijms.24.4.153-158	Bali strait	-8.38235	114.552
76	Seribu islands	Marine	Column	Macro				-	2018	Assuyuti, Yayan Mardiansyah, Reza Bayu Zikrillah, Muhammad Arif Tanzil, Azkiya Banata, Pangestuti Utami. Distribusi dan Jenis Sampah Laut serta Hubungannya terhadap Ekosistem Terumbu Karang Pulau Pramuka, Panggang, Air, dan Kotok Besar di Kepulauan Seribu Jakarta. Majalah Ilmiah Biologi Biosfera : A Scientific Journal DOI:10.20884/1.mib.2018.35.2.707Vol 35, No 2 Mei 2018 : 91-102	Program Studi Biologi, Fakultas Sains dan Teknologi, UIN Syarif Hidayatullah Jakarta, Jl. Ir. H. Juanda No.95 Tangerang Selatan, Banten 15412,	Laboratorium Ekologi, Pusat Laboratorium Terpadu, UIN Syarif Hidayatullah Jakarta, Jl. Ir. H. Juanda No.95 Tangerang Selatan, Banten 15412							Assuyuti, Yayan Mardiansyah, Reza Bayu Zikrillah, Muhammad Arif Tanzil, Azkiya Banata, Pangestuti Utami. Distribusi dan Jenis Sampah Laut serta Hubungannya terhadap Ekosistem Terumbu Karang Pulau Pramuka, Panggang, Air, dan Kotok Besar di Kepulauan Seribu Jakarta. Majalah Ilmiah Biologi Biosfera : A Scientific Journal DOI:10.20884/1.mib.2018.35.2.707Vol 35, No 2 Mei 2018 : 91-102	Seribu islands	-5.83249	106.588
77	Cikapundung river	Riverine	Floating	Macro	LDPE, Mulitlayer, HDPE			kg/min	2020	Honingh, D., van Emmerik, T., Uijttewaal, W., Kardhana, H., Hoes, O., & van de Giesen, N. (2020). Urban river water level increase through plastic waste accumulation. FrEaS, 8, 28.	Department of Water Management, Delft University of Technology, Delft, Netherlands	Hydrology and Quantitative Water Management Group, Wageningen University & Research, Wageningen, Netherlands	Department of Hydraulic Engineering, Delft University of Technology, Delft, Netherlands	Department of Water Resources Engineering, Bandung Institute of Technology, Bandung, Indonesia					Honingh, D., van Emmerik, T., Uijttewaal, W., Kardhana, H., Hoes, O., & van de Giesen, N. (2020). Urban river water level increase through plastic waste accumulation. FrEaS, 8, 28.	Cikapundung river	-6.98876	107.632
78	5 regions	Terrestrial	Waste management	Macro				-	2019	Lestari, P., & Trihadiningrum, Y. (2019). The impact of improper solid waste management to plastic pollution in Indonesian coast and marine environment. Marine pollution bulletin, 149, 110505.	Department of Environmental Engineering, Faculty of Civil, Environmental, and Geo Engineering, Institut Teknologi Sepuluh Nopember, Kampus ITS Sukolilo, Surabaya 60111, Indonesia								Lestari, P., & Trihadiningrum, Y. (2019). The impact of improper solid waste management to plastic pollution in Indonesian coast and marine environment. Marine pollution bulletin, 149, 110505.	5 regions	-	-
79	-	Terrestrial	Waste habit	Macro			-	-	2019	Kandziora, J. H., Van Toulon, N., Sobral, P., Taylor, H. L., Ribbink, A. J., Jambeck, J. R., & Werner, S. (2019). The important role of marine debris networks to prevent and reduce ocean plastic pollution. Marine pollution bulletin, 141, 657-662.	Indonesian Waste Platform, Germany	International Waste Platform							Kandziora, J. H., Van Toulon, N., Sobral, P., Taylor, H. L., Ribbink, A. J., Jambeck, J. R., & Werner, S. (2019). The important role of marine debris networks to prevent and reduce ocean plastic pollution. Marine pollution bulletin, 141, 657-662.	-	-	-
80	Tambak Lorok coastal area, Java	Marine	Column + sediment	Micro	PP, nylon		particles/10 ml		2020	Khoironi, A., Hadiyanto, H., Anggoro, S., & Sudarno, S. (2020). Evaluation of polypropylene plastic degradation and microplastic identification in sediments at Tambak Lorok coastal area, Semarang, Indonesia. Marine Pollution Bulletin, 151, 110868.	Doctoral Program Environmental Sciences, School of Postgraduate Studies, Diponegoro University, Semarang, Indonesia	Faculty of Fisheries and Marine Science, Diponegoro University, Semarang, Indonesia	Environmental Engineering Department, Diponegoro University, Semarang, Indonesia	Chemical Engineering Department, Diponegoro University, Semarang, Indonesia	Centre of Biomass and Renewable Energy, Diponegoro University, Semarang, Indonesia				Khoironi, A., Hadiyanto, H., Anggoro, S., & Sudarno, S. (2020). Evaluation of polypropylene plastic degradation and microplastic identification in sediments at Tambak Lorok coastal area, Semarang, Indonesia. Marine Pollution Bulletin, 151, 110868.	Tambak Lorok coastal area, Java	-6.94292	110.437
81	West Oasapa	Marine	Mangrove	Macro			0.092 items/m^2		2020	Paulus, C. A., Soewarlan, L. C., & Ayubi, A. A. (2020). Distribution of marine debris in mangrove ecotourism area in Kupang, East Nusa Tenggara, Indonesia. AACL Bioflux, 13(5).										West Oesapa	-10.1456	123.635
82	Ciwalengke River	Riverine	Column + Sediment	Micro			particles per liter, particles per 100g sediment		2019	Alam, F. C., Sembiring, E., Muntalif, B. S., & Suendo, V. (2019). Microplastic distribution in surface water and sediment river around slum and industrial area (case study: Ciwalengke River, Majalaya district, Indonesia). Chemosphere, 224, 637-645.										Ciwalengke river	-7.05077	107.767
83	Ciliwung Estuary	Riverine	Biota	Micro	PE, PP, PS	Fragments, Fibers, Granules	particles/m^3		2020	Cordova, M. R., Riani, E., & Shiomoto, A. (2020). Microplastics ingestion by blue panchax fish (Aplocheilus sp.) from Ciliwung Estuary, Jakarta, Indonesia. Marine Pollution Bulletin, 161, 111763.										Ciliwung estuary	-6.12127	106.863
